# Supplementary material for: Cr(VI)-Mediated Homogeneous Fenton Oxidation for Decolorization of Methylene Blue Dye: Sludge Free and Pertinent to a Wide pH Range
Source: PubMed Central journal article supplement — ACS Omega. 2021 Oct 5;6(41):27288–96. doi: 10.1021/acsomega.1c04090 (PMC8529654; doi:10.1021/acsomega.1c04090), 2021-10-05

**Cr(VI) mediated homogeneous Fenton oxidation for decolorization of Methylene Blue dye:  
sludge free and pertinent to wide pH range**

Varuna S. Watwe<sup>1</sup>, Sunil D. Kulkarni<sup>2</sup>, Preeti S. Kulkarni<sup>1\*</sup>

<sup>1</sup>Post-graduate and Research Centre, Department of Chemistry, MES Abasaheb Garware College, Pune, India.

<sup>2</sup>Post-graduate and Research Centre, Department of Chemistry, S. P. Mandali's Sir Parashurambhau College, Tilak Road, Pune, India

#Affiliated to Savitribai Phule Pune University (*Formerly University of Pune*), Pune.

\*Corresponding Author:

Phone: (O) +9120 41038200.

Email: [psk.agc@mespune.in](mailto:psk.agc@mespune.in)

## SUPPORTING INFORMATION

### Table of Content (Supporting Information)

**Table ST1:** Time required for complete MB decolorization at different MB concentrations.

**Figure S1:** Fluorescence plot of 7-hydroxycoumarin.

**Table S1:** Time required for complete MB decolorization at different MB concentrations.

| Concentration of Methylene blue ( $\mu\text{M}$ ) | Time taken for Complete decolorization (min) |
|---------------------------------------------------|----------------------------------------------|
| 7.8                                               | 20 $\pm$ 2                                   |
| 15.7                                              | 30 $\pm$ 2                                   |
| 23.5                                              | 45 $\pm$ 3                                   |
| 31.4                                              | 70 $\pm$ 2                                   |
| 39.2                                              | 120 $\pm$ 3                                  |

**Figure S1:** Fluorescence intensity of 7 hydroxycouarin in Cr(VI)/H<sub>2</sub>O<sub>2</sub> and H<sub>2</sub>O<sub>2</sub> system. Reaction conditions: [Coumarin] = 0.1mM, [Cr(VI)]=3mM, [H<sub>2</sub>O<sub>2</sub>]=19.4 mM, temperature=298K and pH =6.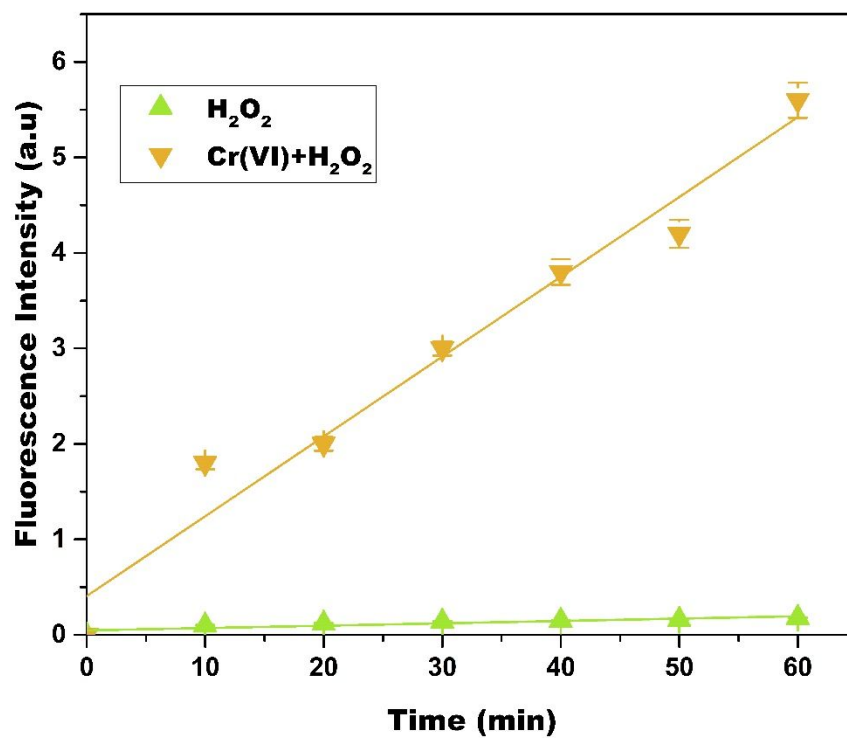

Supplement: ao1c04090_si_001.pdf [file ao1c04090_si_001.pdf]
